# Supplementary material for: Enhancing the performance of PbS:CsPbBr3 bulk-heterojunction photodetectors by treating with imidazolium-based ionic liquids
Source: Royal Society of Chemistry journal article supplement (doi:10.1039/d3nr06640a), 2024-01-01
Supplement: d3nr06640a1.pdf [file d3nr06640a1.pdf]

## Supporting Information

### **To enhance performance of PbS:CsPbBr<sub>3</sub> bulk-heterojunction photodetectors by treating with Imidazolium-based ionic liquids**

Ying Wang<sup>1</sup>, Shengyi Yang<sup>1\*</sup>, Muhammad Sulaman<sup>1</sup>, Guanzhen Zou<sup>1</sup>, Haiyuan Xin<sup>1</sup>, Zhenhua Ge<sup>1</sup>, Zhenheng Zhang<sup>1</sup>, Mengchun Zhu<sup>1</sup>, Bingsuo Zou<sup>2</sup>, Yurong Jiang<sup>3</sup>

<sup>1</sup>Beijing Key Lab of Nanophotonics and Ultrafine Optoelectronic Systems, School of Physics, Beijing Institute of Technology, Beijing 100081, P. R. China

<sup>2</sup>School of Physical Science and Technology, Guangxi University, Nanning 530004, P. R. China

<sup>3</sup>School of Optics and Photonics, Beijing Institute of Technology, Beijing 100081, P. R. China

**KEYWORDS:** Perovskites, colloidal quantum dots, surface-passivation, ligand exchange, hybrid bulk-heterojunction, energy band, broadband photodetectors.

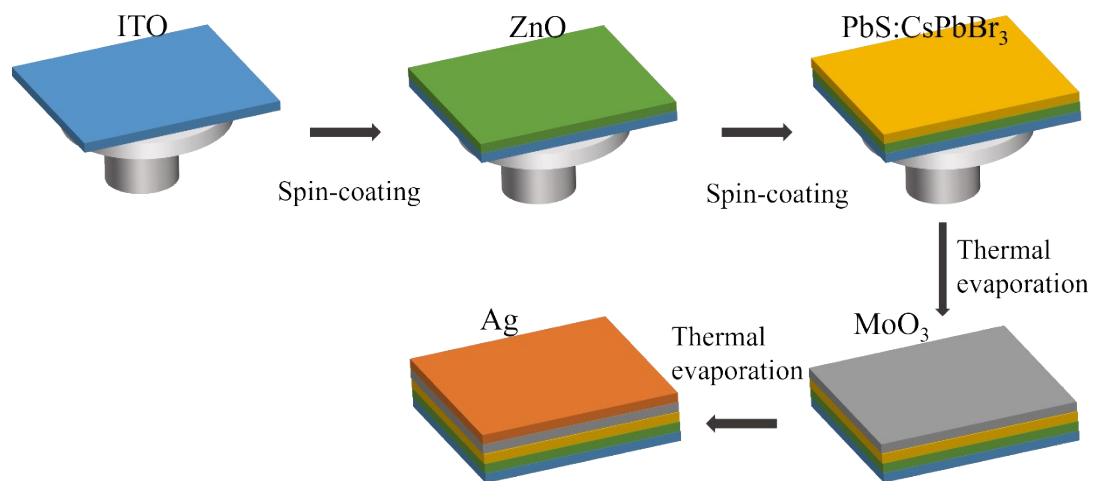

**Fig.S1** Schematic diagram of the fabrication process for bulk-heterojunction photodetectors ITO/ZnO/PbS:CsPbBr<sub>3</sub>/MoO<sub>3</sub>/Ag.

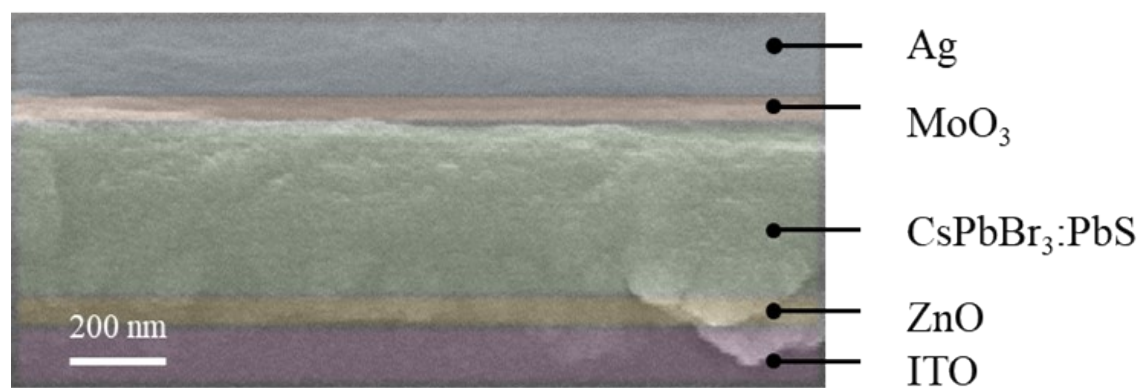

**Fig.S2** Cross-sectional SEM image of the photodetectors ITO/ZnO/PbS:CsPbBr<sub>3</sub>/MoO<sub>3</sub>/Ag.

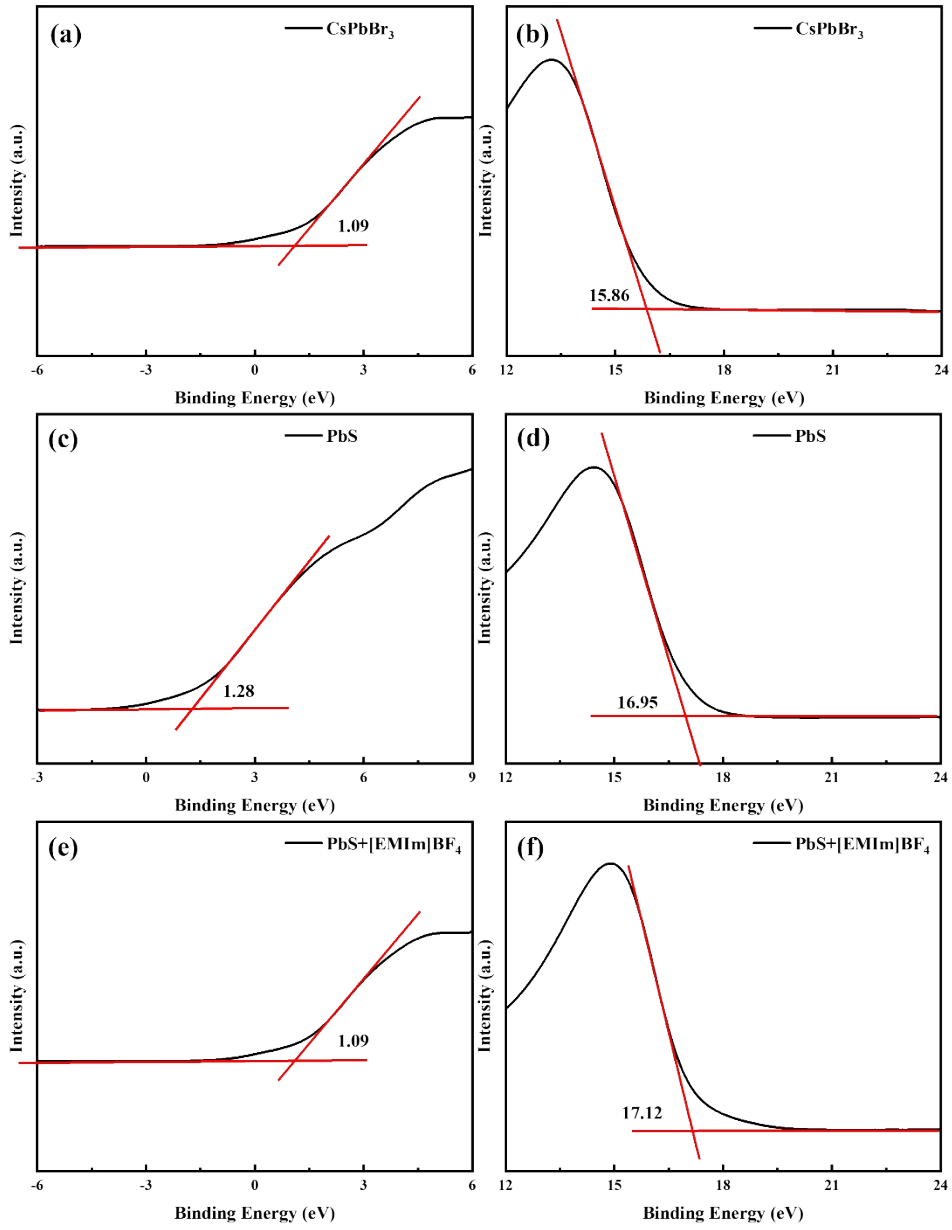

**Fig.S3** UPS of CsPbBr<sub>3</sub> (a-b), PbS (c-d) and PbS+[EMIM]BF<sub>4</sub> (e-f).

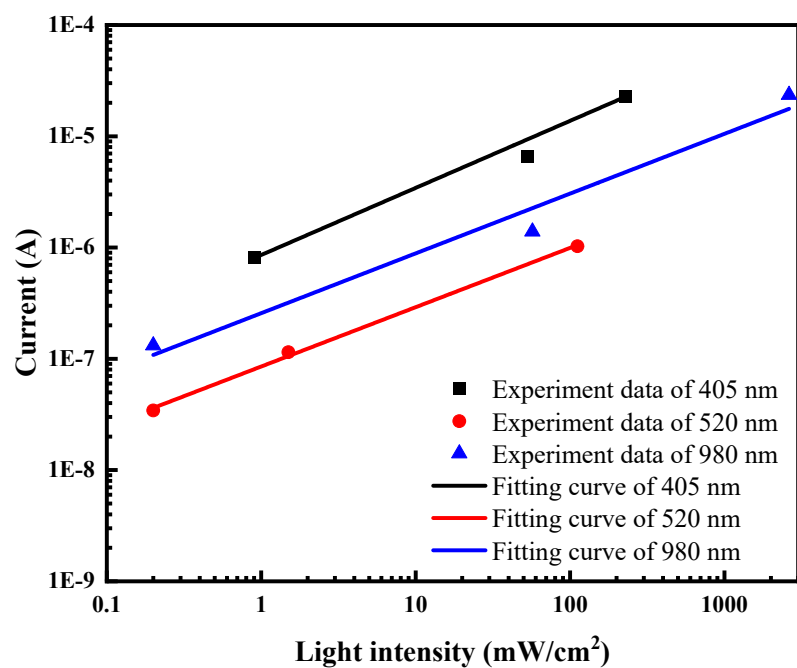

Figure S4 LDR of photodetectors under different wavelength illuminations.
